# Supplementary material
Source: PubMed Central journal article supplement (PMC6395340)

**Highly sensitive methods are required to detect mutations in histiocytoses**

Sarah Melloul,<sup>1\*</sup> Zofia Hélias-Rodzewicz,<sup>1,2\*</sup> Fleur Cohen-Aubart,<sup>3,4\*</sup> Frédéric Charlotte,<sup>3,5</sup> Sylvie Fraitag,<sup>6</sup> Nathalie Terrones,<sup>1,2</sup> Quentin Riller,<sup>4</sup> Thibaud Chazal,<sup>4</sup> Sébastien Héritier,<sup>1,7</sup> Anne Moreau,<sup>8</sup> Marianne Kambouchner,<sup>9</sup> Marie Christine Copin,<sup>10</sup> Jean Donadieu,<sup>1,7</sup> Valérie Taly,<sup>11</sup> Zahir Amoura,<sup>3,4</sup> Julien Haroche<sup>3,4</sup> and Jean François Emile<sup>1,2</sup>

<sup>1</sup>EA4340, Versailles University, Paris-Saclay university, Boulogne; <sup>2</sup>Department of Pathology, APHP (Assistance Publique Hôpitaux de Paris), University Hospital Ambroise Paré, Boulogne; <sup>3</sup>Pierre et Marie Curie University, Paris; <sup>4</sup>Department of Internal Medicine, APHP, Centre de référence des histiocytoses, University Hospital La Pitié-Salpêtrière Paris; <sup>5</sup>Department of Pathology, APHP, University Hospital La Pitié-Salpêtrière, Paris; <sup>6</sup>Department of Pathology, APHP, Necker Hospital, Paris; <sup>7</sup>Department of Haematology, AP-HP, Trousseau Hospital, Paris; <sup>8</sup>Department of Pathology, Hôtel Dieu, Nantes; <sup>9</sup>Department of Pathology, APHP, Avicenne Hospital, Bobigny; <sup>10</sup>Regional University Hospital Center of Lille and <sup>11</sup>INSERM UMR-S1147, CNRS SNC5014; Paris Descartes University, France

\*SM, ZH-R and FC-C contributed equally to this work.

Correspondence: JEAN FRANÇOIS EMILE -  
jean-francois.emile@uvsq.fr  
doi:10.3324/haematol.2018.201194

Supplementary figure 1

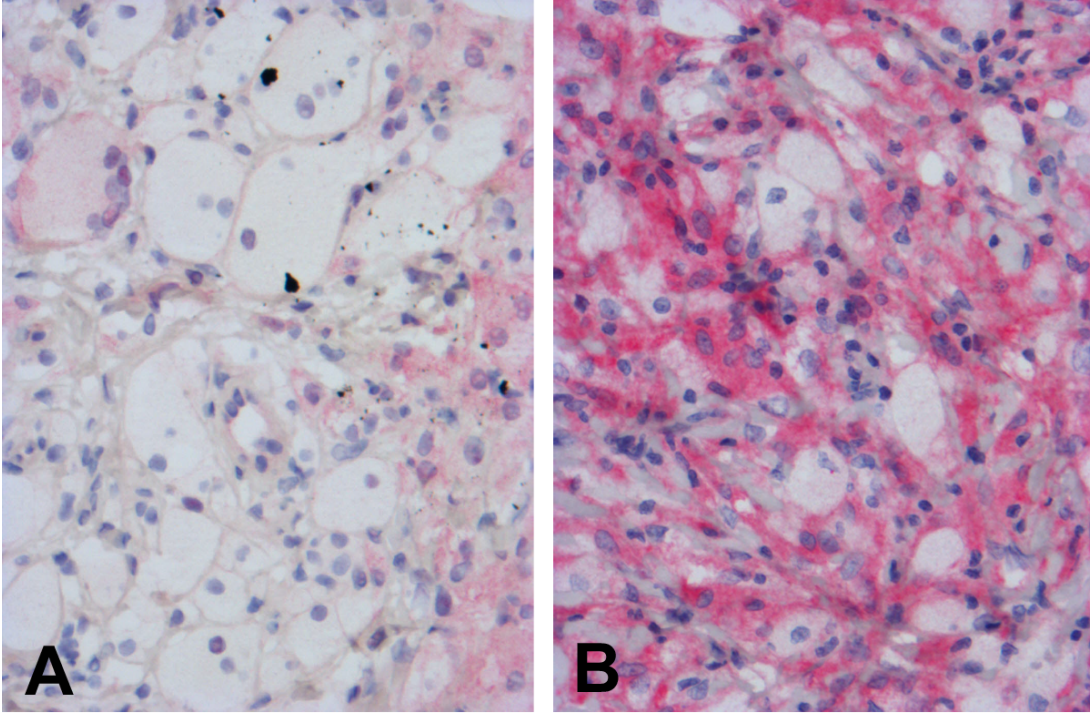

Legends:

VE1 staining with only few (A) or abundant (B) positive histiocytes.

## Characteristics of the analyzed patients

| <b>Table 1. Clinical characteristics of 474 adults patients with histiocytosis of the L group (577 samples)</b>      |                                            |
|----------------------------------------------------------------------------------------------------------------------|--------------------------------------------|
| Sex                                                                                                                  | 150 females, 270 males and 54 undetermined |
| Median age at diagnosis, range                                                                                       | 54.1 (18.03-90.67)                         |
| <b>Diagnostic</b>                                                                                                    |                                            |
| ECD                                                                                                                  | 236                                        |
| LCH                                                                                                                  | 152                                        |
| Mixed histiocytosis (ECD+LCH)                                                                                        | 44                                         |
| Unclassified                                                                                                         | 42                                         |
| <b>Localization</b>                                                                                                  |                                            |
| central nervous system                                                                                               | 16                                         |
| skin and mucous membrane                                                                                             | 114                                        |
| lung and pleura                                                                                                      | 43                                         |
| kidney and peri renal                                                                                                | 107                                        |
| bone                                                                                                                 | 161                                        |
| others                                                                                                               | 108                                        |
| undertermined                                                                                                        | 28                                         |
| <b>Distribution of 287 patients regarding their mutational status- Within L Group H ( without non informative) :</b> |                                            |
| V600E pyrosequençage                                                                                                 | 114                                        |
| V600E droplet                                                                                                        | 63                                         |
| WT                                                                                                                   | 85                                         |
| Others mutations : MAP2K1, NRAS, KRAS, PTPN11, BRAF deletion                                                         | 25                                         |

Samples which turned out to be positive with the highly sensitive pddPCR: table and flowshart

| <b>Combined analysis Pyrosequencing and PddPCR</b> |                |                       |       |           |       |                        |
|----------------------------------------------------|----------------|-----------------------|-------|-----------|-------|------------------------|
|                                                    |                | <b>PddPCR results</b> |       |           |       |                        |
|                                                    |                | WT                    | V600E | Equivocal | Total | % sauvés par catégorie |
| <b>Pyrosequencing results</b>                      | WT             | 79                    | 17    | 6         | 102   | 16,67%                 |
|                                                    | WT limit       | 37                    | 20    | 5         | 62    | 32,26%                 |
|                                                    | Probably V600E | 0                     | 4     | 2         | 6     | 66,67%                 |
|                                                    | V600E          | 1                     | 7     | 2         | 10    | 10,00%                 |
|                                                    |                | 117                   | 48    | 15        | 180   |                        |

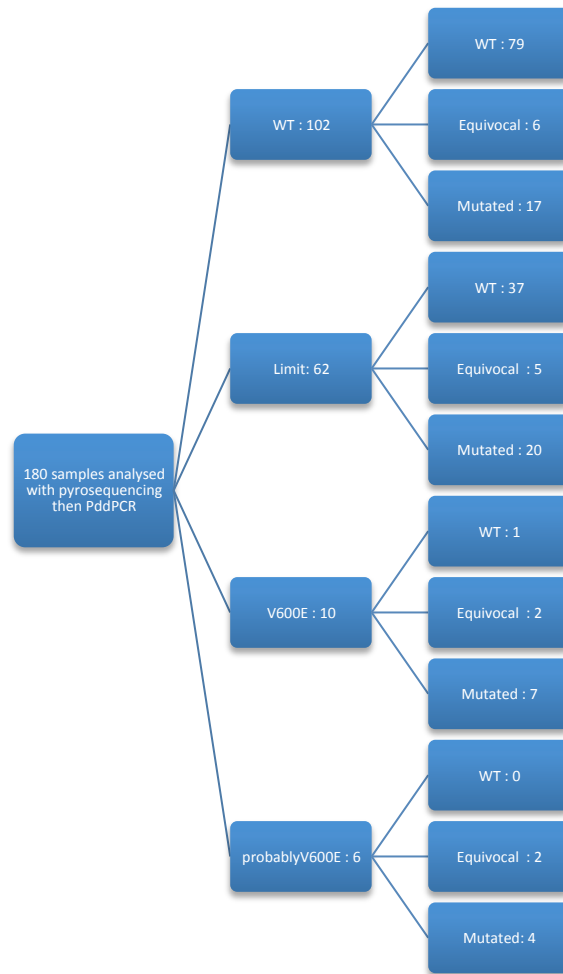

**Legends:**

The saved correspond to the green boxes. These are those found mutated in pddPCR while they was not mutated in pyrosequencing. In our figures we saved 41 out of 173 (23.69%).

Global algorithm of the study :

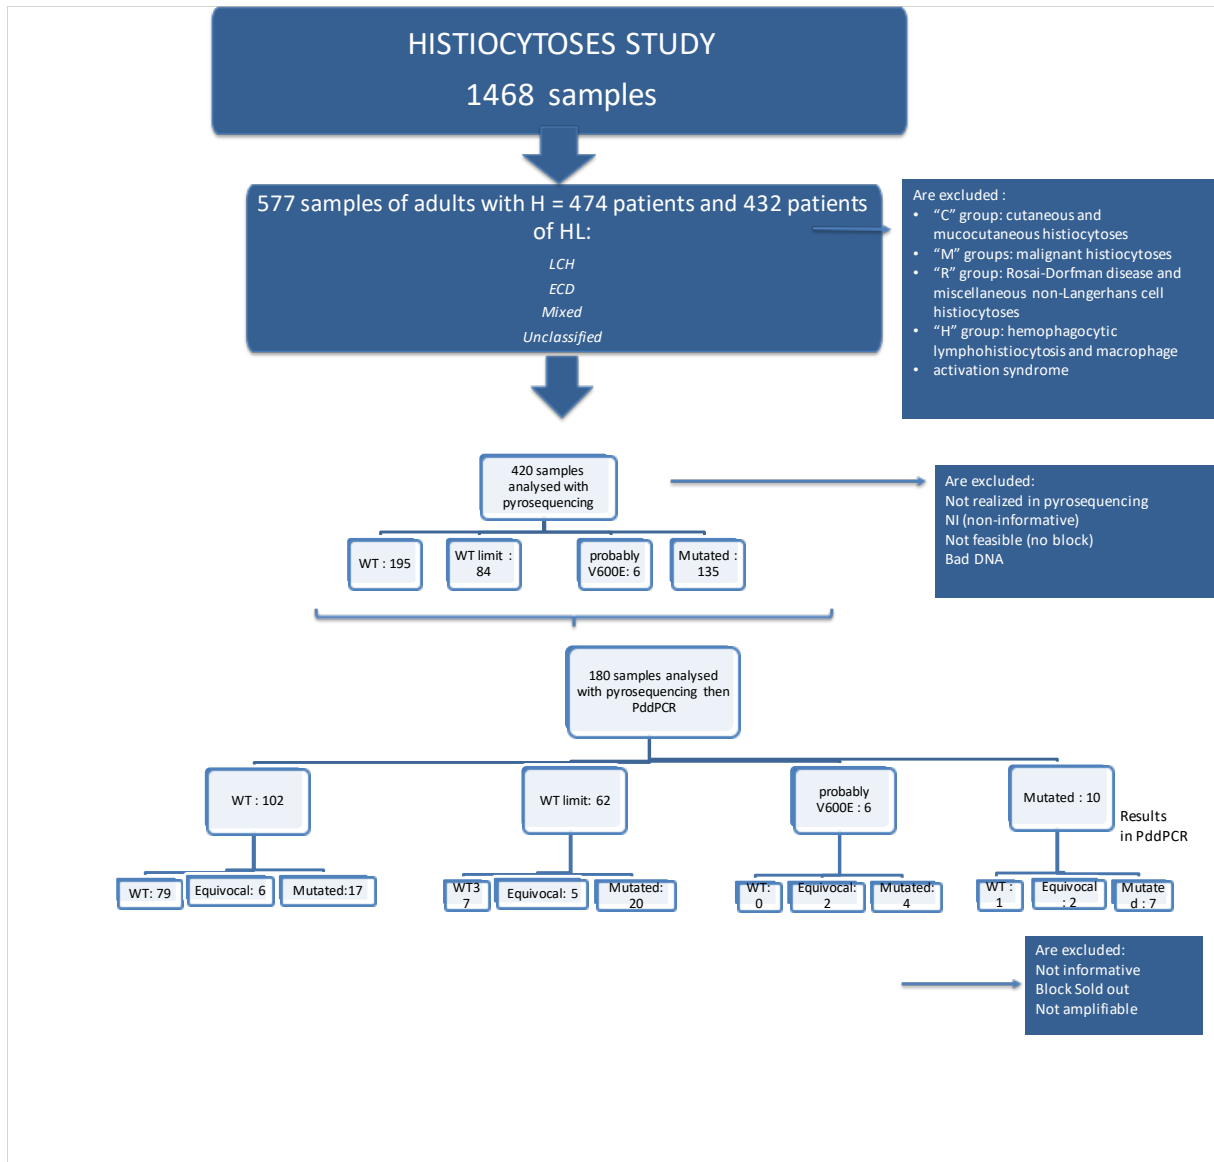

Supplement: 2018.201194.MELLOUL_SUPPL.pdf [file 2018.201194.MELLOUL_SUPPL.pdf]
