# Supplementary material
Source: PubMed Central journal article supplement (PMC6395340)
Supplement: 2018_201194-Disclosures_and_Contributions.pdf [file 2018_201194-Disclosures_and_Contributions.pdf]

Haematologica  
HAEMATOL/2018/201194  
Version 4

Highly sensitive methods are required to detect mutations in  
histiocytoses

Sarah Melloul, Zofia Hélias-Rodzewicz, Fleur Cohen-Aubart, Frédéric Charlotte, Sylvie Fraitag, Nathalie Terrones, Quentin Riller, Thibaud Chazal, Sébastien Héritier, Anne Moreau, Marianne Kambouchner, Marie Christine Copin, Jean Donadieu, Valérie Taly, Zahir Amoura, Julien Haroche, and Jean François Emile

Disclosures: JFE received honoraria from Roche, GlaxoSmithKline, and Pierre Fabre. The remaining authors declare no competing financial interests.

Contributions: JFE designed the study; SM, ZRH, FCA, JH & JFE collected the data; FC & JFE reviewed the histological samples; ZHR, NT, SH, VT & JFE determined the BRAF status; SM & JFE conducted the statistical analysis; All this authors contributed to analysis and interpretation the data; SM and JFE wrote the manuscript; and all authors critically reviewed and approved the final version of the manuscript.
